# Supplementary material for: A DNA walker triggered isothermal amplification method based on freezing construction of AuNP probes and its application in ricin detection
Source: Royal Society of Chemistry journal article supplement (doi:10.1039/d2an01793h), 2022-12-29
Supplement: d2an01793h1.pdf [file d2an01793h1.pdf]

## Supporting Information

### **DNA walker triggered isothermal amplification method based on freezing construction of AuNP probes and its application in ricin detection**

Xuan Sun,<sup>\*a</sup> Weiya Wang,<sup>b</sup> Yanyan Chai,<sup>c</sup> Zhou Zheng,<sup>a</sup> Yu Wang,<sup>b</sup> Jing Bi,<sup>a</sup> Qian Wang,<sup>a</sup> Yonggang Hu<sup>\*c</sup> and Zhixian Gao<sup>\*b</sup>

<sup>a</sup> School of Basic Medical Sciences, Hubei University of Chinese Medicine, Wuhan 430065, China

<sup>b</sup> Tianjin Key Laboratory of Risk Assessment and Control Technology for Environment and Food Safety, Tianjin Institute of Environment and Operational Medicine, Tianjin 300050, China

<sup>c</sup> College of Life Science and Technology, Huazhong Agricultural University, Wuhan 430070, China

## List of Contents

1. **Figure S1.** Stability investigation and the synthesis diagram of AuNP-DNA probe.
2. **Figure S2.** Optimization of synthesis conditions of AuNP-DNA probe.
3. **Figure S3.** The UV–Vis spectroscopy of the stability of AuNP-DNA probe.
4. **Figure S4.** Schematic diagram of the acquisition of complementary fluorescent DNA in AuNP-DNA probe.
5. **Figure S5.** Schematic diagram of the DNA Walker reaction.
6. **Figure S6.** Fluorescence curve of EXPAR reaction with 6 MBs.
7. **Figure S7.** Condition optimization of EXPAR-MB method Native-PAGE analysis of the ricin.
8. **Figure S8.** Native-PAGE analysis of the ricin.
9. **Figure S9.** Fluorescence spectra of 3 aptamers (A3, C1, and C5) under different conditions.
10. **Table S1.** Hybridization efficiency of different type of AuNP-DNA probes
11. **Table S2.** Application of the method for ricin detection in practical samples
12. **Table S3.** Sequences of synthesized DNA

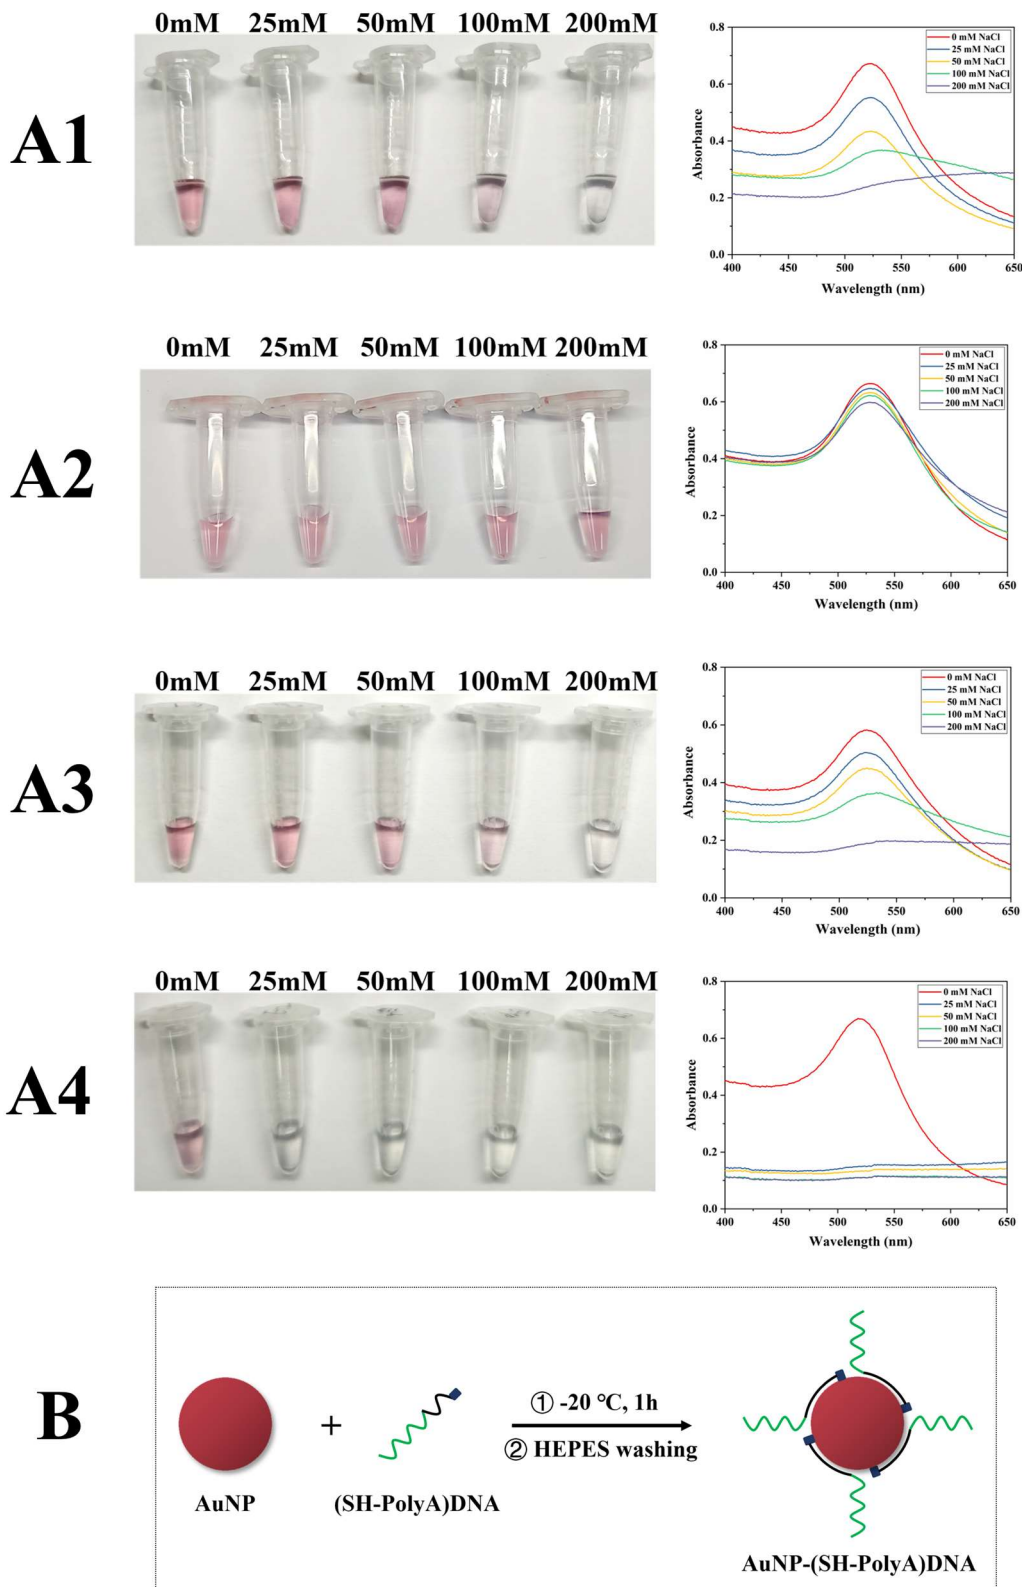

**Figure S1.** Stability investigation and the synthesis diagram of AuNP-DNA probes. (A1)

The photograph and UV-Vis spectroscopy of the stability of AuNP-(SH)DNA after freezing construction process with the addition of different NaCl concentrations. (A2)

The photograph and UV–Vis spectroscopy of the stability of AuNP-(SH-PolyA)DNA after freezing construction process with the addition of different NaCl concentrations.

(A3) The photograph and UV–Vis spectroscopy of the stability of AuNP-(PolyA)DNA after freezing construction process with the addition of different NaCl concentrations.

(A4) The photograph and UV–Vis spectroscopy of the stability of AuNP-(no SH or PolyA)DNA after freezing construction process with the addition of different NaCl concentrations. The concentrations of NaCl are: 0 mM, 25 mM, 50 mM, 100 mM, 200 mM. (B) Schematic diagram of synthesizing AuNP-DNA probe with AuNP and (SH-PolyA)DNA.

The photographs at the left shows that almost no change in color only for AuNP-(SH-PolyA)DNA group can be observed with the increase of NaCl concentration (Figure S1 A2). Meanwhile, the UV–Vis spectroscopy on the right panel displays that in the presence of 0 to 200 mM NaCl, except for AuNP-(SH-PolyA)DNA group (Figure S1 A2), the absorbance peak varies greatly. Therefore, as shown in Figure S1 B, we chose (SH-PolyA) DNA and AuNP freezing construction for AuNP-DNA probe.

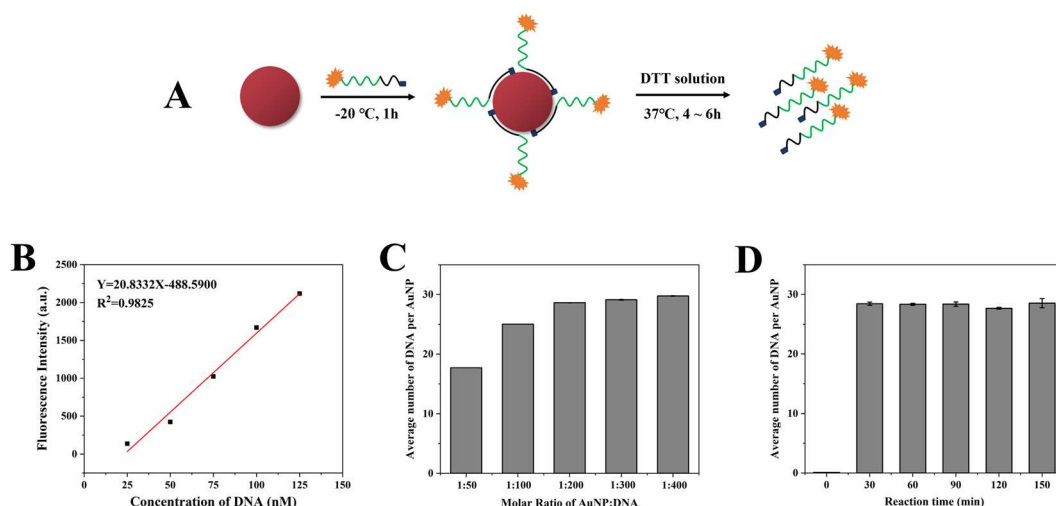

**Figure S2.** Optimization of the synthesis conditions of AuNP-DNA probe. (A) Schematic diagram of the acquisition of fluorescent DNA in AuNP-DNA probe. (B) Standard curve between the fluorescence intensity and the DNA concentration (25-125 nM) [ $Y=20.8332X-488.5900$  ( $R^2=0.9825$ )]. (C) Optimization of the molar ratio of AuNP:DNA. The average number of connecting DNA per AuNP increases gradually until the ratio reaches 1:200, so the 1:200 is chosen for AuNP:DNA in the following experiment. (D) Optimization of freezing time. The average number of connecting DNA per AuNP reaches the maximum at 30 min. But the freezing effect ( $-20^{\circ}\text{C}$ ) is related to the performance of the refrigerator, sample size, and sample placement position, we choose the freezing time of 60 min to ensure that the sample is completely frozen.

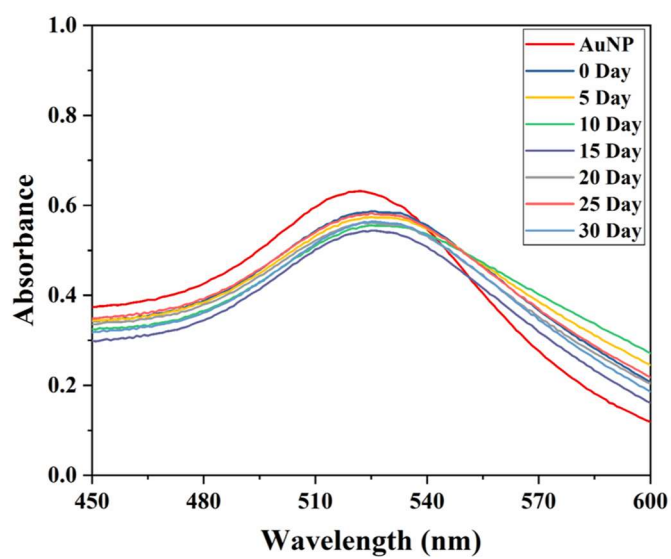

**Figure S3.** The UV–Vis spectroscopy of the stability of AuNP-DNA probe.

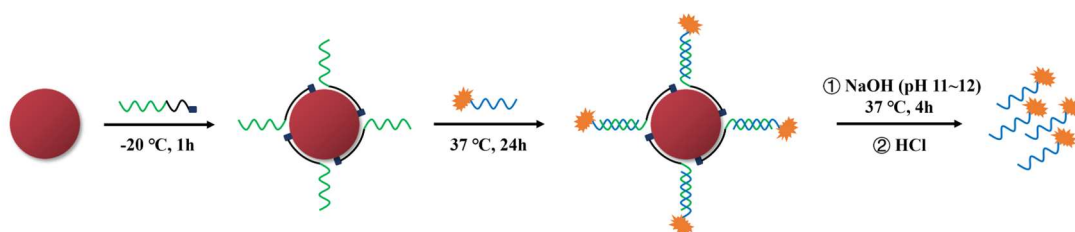

**Figure S4.** Schematic diagram of the acquisition of complementary fluorescent DNA in AuNP-DNA probe.

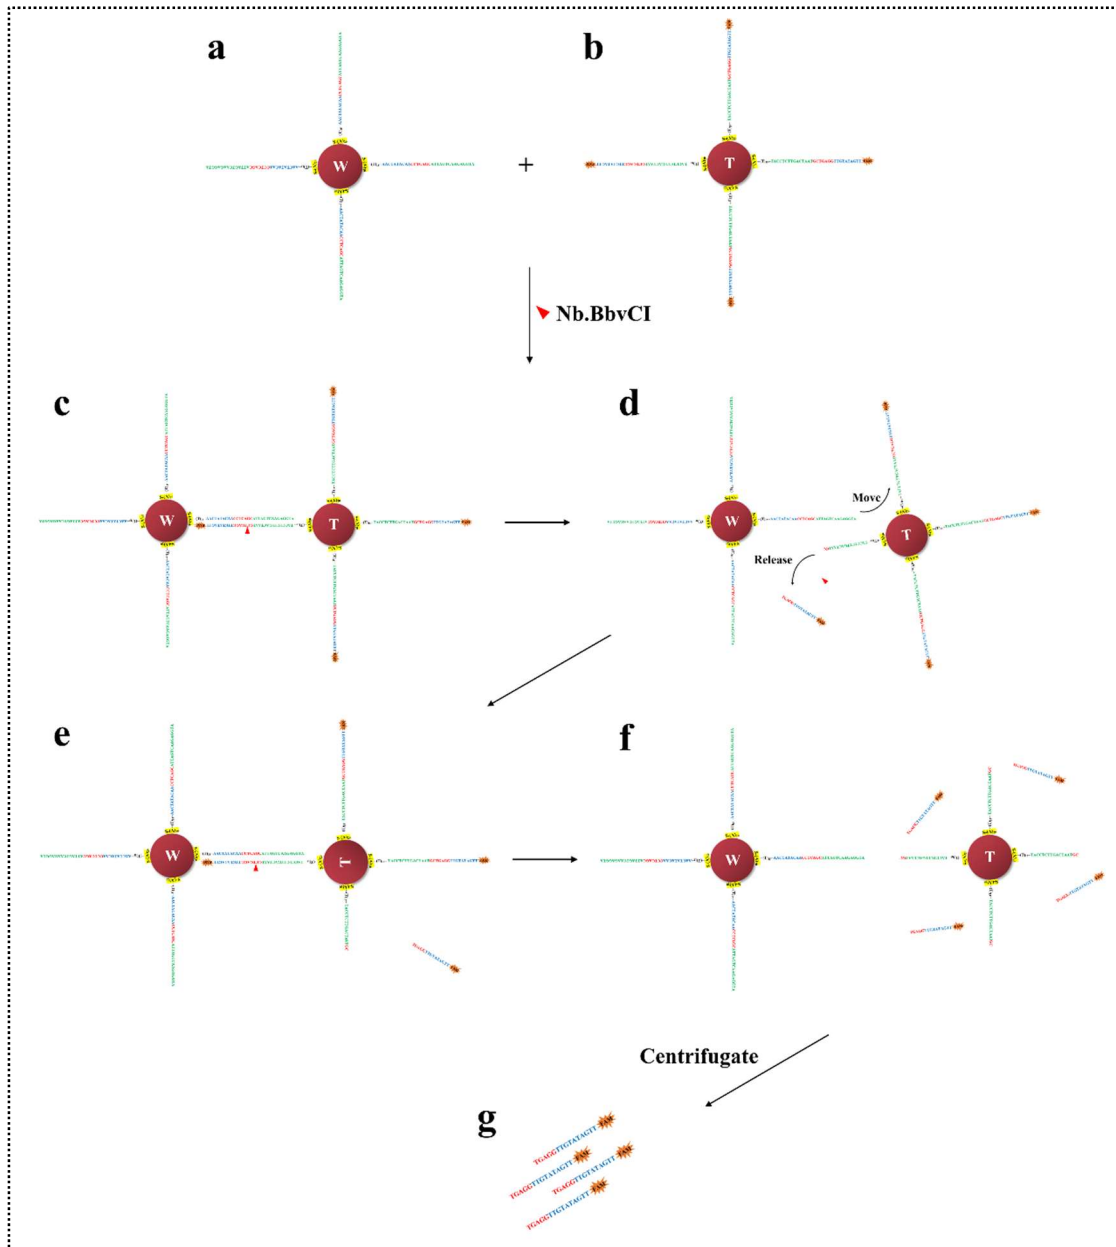

**Figure S5.** Schematic diagram of the DNA Walker reaction. AW (AuNP-Walker probe) recognizes and cleaves the DNA (FAM) on the AT (AuNP-Track probe). After the relative motion of AT, the remaining DNA track strands are also cleaved by the AW in turn, producing a large amount of ssDNA (FAM).

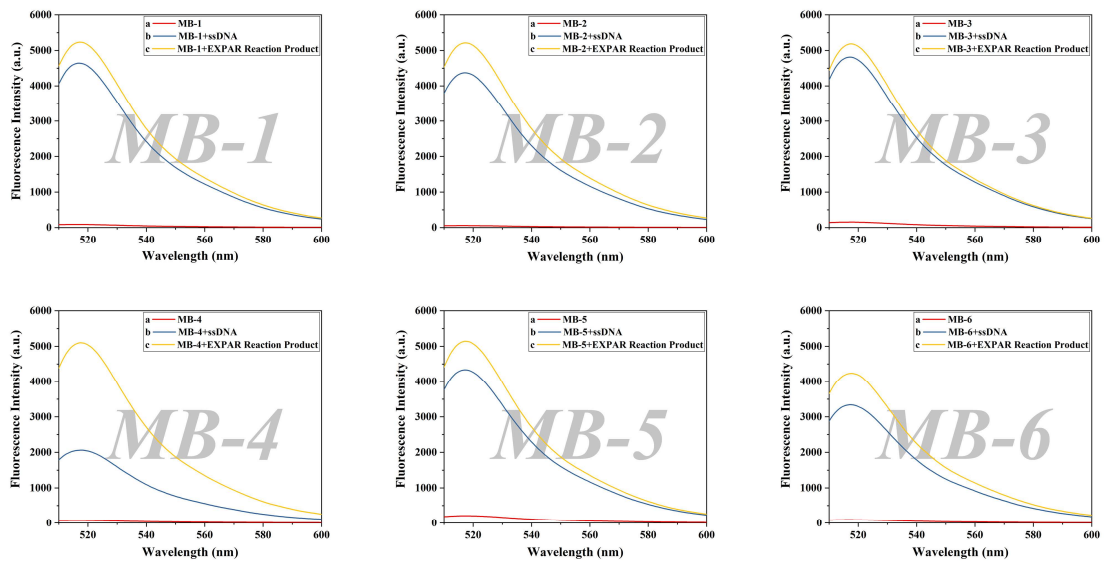

**Figure S6.** Fluorescence curve of EXPAR reaction with 6 MBs. Group a, MB; Group b, MB is mixed with ssDNA (1:1); Group c, MB is mixed with the product of EXPAR.



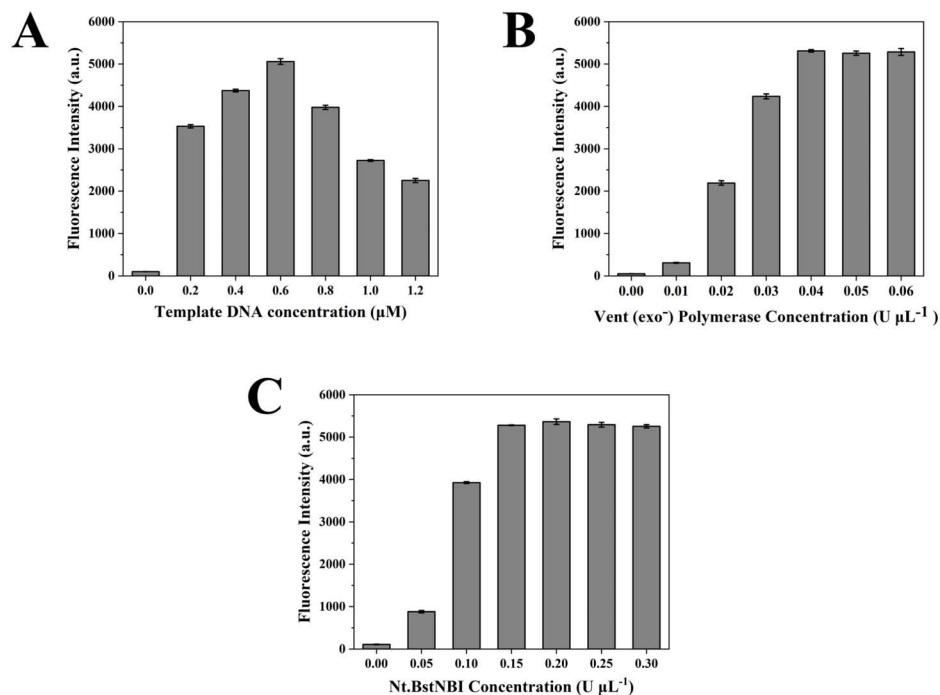

**Figure S7.** Condition optimization of EXPAR-MB method. (A) Optimization of the Template DNA concentration. The fluorescence intensity reaches a maximum at 0.6  $\mu\text{M}$ , so the 0.6  $\mu\text{M}$  Template DNA is selected in the following experiment. (B) Optimization of the Vent ( $\text{exo}^-$ ) DNA polymerase concentration. As the concentration of vent ( $\text{exo}^-$ ) DNA polymerase increases, the fluorescence intensity increases gradually to 0.04  $\text{U } \mu\text{L}^{-1}$ . Thus, 0.04  $\text{U } \mu\text{L}^{-1}$  Vent ( $\text{exo}^-$ ) DNA polymerase is chosen for this experiment. (C) Optimization of the Nt.BstNBI concentration. The produced fluorescence signals increase with increasing concentration of Nt.BstNBI until the concentration reaches 0.15  $\text{U } \mu\text{L}^{-1}$ . Hence, we select 0.15  $\text{U } \mu\text{L}^{-1}$  Nt.BstNBI in the subsequent research.

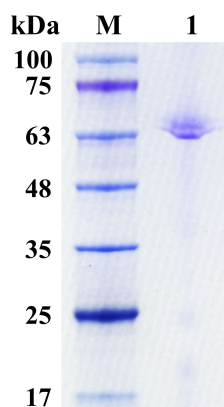

**Figure S8.** Native-PAGE analysis of the ricin. Lane M, protein marker; lane 1, ricin (~64kDa).

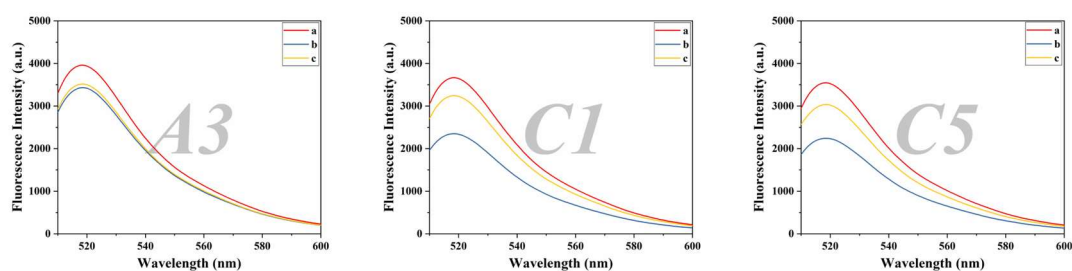

**Figure S9.** Fluorescence spectra of 3 aptamers (A3, C1, and C5) under different conditions. Curve a, only aptamer(FAM); Curve b, the supernatant after mixing and centrifuging solutions aptamer(FAM) and AW; Curve c, the supernatant after mixing and centrifuging solutions aptamer(FAM), AW, and ricin.

**Table S1** Hybridization efficiency of different type of AuNP-DNA probes

| Type               | Connecting DNA     |                             | Complementary DNA  |                             | Hybridization efficiency (%) <sup>c</sup> |
|--------------------|--------------------|-----------------------------|--------------------|-----------------------------|-------------------------------------------|
|                    | Concentration (nM) | Average number <sup>a</sup> | Concentration (nM) | Average number <sup>b</sup> |                                           |
| AuNP-(SH)DNA       | 107.37             | 27                          | 58.52              | 15                          | 55.50                                     |
| AuNP-(SH-PolyA)DNA | 116.40             | <b>30</b>                   | 91.56              | <b>23</b>                   | <b>78.66</b>                              |
| AuNP-(PolyA)DNA    | 82.74              | 21                          | 56.94              | 14                          | 68.82                                     |

<sup>a</sup> The average number of connecting DNA per AuNP can be calculated by dividing the concentration of connecting DNA by the concentration of AuNP.

<sup>b</sup> The average number of complementary DNA per AuNP can be calculated by dividing the concentration of complementary DNA by the concentration of AuNP.

<sup>c</sup> The hybridization efficiency (%) was calculated by dividing the concentration of complementary DNA by the concentration of connecting DNA.

**Table S2.** Application of the method for ricin detection in practical samples

| Sample       | Original Value (pM) | Add (pM)        | Found (pM)             | Recovery (%) | RSD (%) |
|--------------|---------------------|-----------------|------------------------|--------------|---------|
| Spring Water | Not found           | 10 <sup>4</sup> | 0.9887×10 <sup>4</sup> | 98.87        | 2.87    |
|              | Not found           | 10 <sup>3</sup> | 1.0296×10 <sup>3</sup> | 102.96       | 1.20    |
|              | Not found           | 10 <sup>2</sup> | 1.0339×10 <sup>2</sup> | 103.39       | 3.19    |
| Skim Milk    | Not found           | 10 <sup>4</sup> | 0.9684×10 <sup>4</sup> | 96.84        | 0.68    |
|              | Not found           | 10 <sup>3</sup> | 1.0136×10 <sup>3</sup> | 101.36       | 4.21    |
|              | Not found           | 10 <sup>2</sup> | 0.9821×10 <sup>2</sup> | 98.21        | 2.93    |
| Apple Juice  | Not found           | 10 <sup>4</sup> | 0.9962×10 <sup>4</sup> | 99.62        | 1.18    |
|              | Not found           | 10 <sup>3</sup> | 1.0423×10 <sup>3</sup> | 104.23       | 3.76    |
|              | Not found           | 10 <sup>2</sup> | 0.9759×10 <sup>2</sup> | 97.59        | 2.38    |

**Table S3.** Sequences of synthesized DNA

| DNA name                     | Sequence (5' to 3') description                      |
|------------------------------|------------------------------------------------------|
| (SH)DNA                      | (SH) AACTATACAACCTCAGCATTAGTCAAGAGGTA                |
| (SH-PolyA)DNA/<br>Walker DNA | (SH)A <sub>20</sub> AACTATACAACCTCAGCATTAGTCAAGAGGTA |
| (PolyA)DNA                   | A <sub>20</sub> AACTATACAACCTCAGCATTAGTCAAGAGGTA     |
| DNA                          | AACTATACAACCTCAGCATTAGTCAAGAGGTA                     |
| Track DNA                    | (SH)A <sub>20</sub> TACCTCTTGACTAATGCTGAGGTTGTATAGTT |
| Template                     | AACTATACAACCTCAAACAGACTCAAACCTATACAACCTCAA           |
| ssDNA                        | TGAGGTTGTATAGTT                                      |
